# Supplementary material for: Effect of In-Person Delivered Behavioural Interventions in People with Multimorbidity: Systematic Review and Meta-analysis
Source: Int J Behav Med. 2022 Apr 28;30(2):167–89. doi: 10.1007/s12529-022-10092-8 (PMC10036283; doi:10.1007/s12529-022-10092-8)
Supplement: Supplementary file 1 — Supplementary file1 (XLSX 31 KB) [file 12529_2022_10092_MOESM1_ESM.xlsx]

## Sheet: dataset_BCT
Author	Year	Country	KOA_HOA_proportion	Hypertension_proportion	T2DM_proportion	Dep_proportion	HF_IHD_proportion	COPD_proportion	Age_mean	%_female	BMI	Exercise_vs_pa	Components of intervention	Freq_sessions_t/w	MoD	Mode_delivery	Setting_interv	Timepoint	Weeks_PR	n_oPA_IG	n_oPA_CG	mean_int_oPA	SD_int_oPA	mean_con_oPA	SD_con_oPA	outcome_description_oPA	n_WL_IG	n_WLA_CG	mean_int_WL	SD_int_WL	mean_con_WL	SD_con_WL	outcome_description_WL	n_PF_IG	n_PF_CG	mean_int_PF	SD_int_PF	mean_con_PF	SD_con_PF	outcome_description_PF	n_HRQL_IG	n_HRQL_CG	mean_int_HRQL	SD_int_HRQL	mean_con_HRQL	SD_con_HRQL	outcome_description_HRQL	n_DEP_IG	n_DEP_CG
Koukouvou 2004	2004	Greece	0	12	0	100	100	0	52	0	28.1	1	Exercise	4	1	Group	Fitness centres	1	26	16	10	12.8	2.5	9.5	1.2	METs	16	10	27.4	4.2	28	4.3	BMI								16	10	9.1	1.1	7.1	1.1	QLI	16	10
Kulcu 2007	2007	Turkey	0	0	0	100	100	0	59	27		1	Exercise	3	0	1 to 1	Hospital (cardio pulmonary rehabilitation clinic)	1	8	23	21	7.2	2.8	6.5	1.4	METs															23	21	128.9	12	125.3	17.6	Hacettepe Quality of Life Questionnaire	23	21
Gary 2010a	2010	USA	0	88	29	100	100	0	65.8	57.1		1	Exercise + Education	3	0	1 to 1 and self-help	Home	1	12															20	9	307.8	125.3	287.1	125.3	6MWT	20	15	-29.2	18.1	-26.4	23.7	MLHFQ	20	9
Gary 2010b	2010	USA	0	88	29	100	100	0	65.8	57.1		1	Exercise + Education + CBT	3	0	1 to 1 and self-help	Home	1	12															16	9	400.6	102.5	290.9	134.8	6MWT	16	17	-27.3	16.8	-26.7	20.21	MLHFQ	16	9
Gary 2010a	2010	USA	0	88	29	100	100	0	65.8	57.1		1	Exercise + Education	3	0	1 to 1 and self-help	Home	2	24															17	8	317.9	132.3	271.5	161.7	6MWT	17	14	-25.6	19.7	-28.9	29.9	MLHFQ	17	8
Gary 2010b	2010	USA	0	88	29	100	100	0	65.8	57.1		1	Exercise + Education + CBT	3	0	1 to 1 and self-help	Home	2	24															15	8	411.5	100.8	317.9	132.3	6MWT	15	16	-24.2	16.3	-34.3	23.6	MLHFQ	15	8
Katon 2010	2010	USA	0	0	100	100	27	0	57	52	36.7	0	Self-care + pharmacology	0.5	0	1 to 1	Clinic	1	52																						94	92	6	2.2	5.2	1.9	QoL 10 scale (10 highest)	105	106
Piette 2011	2011	USA	0	0	100	100	0	0	56	51.5	37.6	0	CBT + Usual care	1	0	1 to 1	Home	1	12	145	146	4499	2612	3226	1860	Step counts								145	146	39.6	11.7	36.3	12.2	SF-12 PF	145	146	38.2	12	35.8	12	SF-12 pcs	145	146
Åsa 2012	2012	Sweden	0	0	100	0	100	0	67	20	29	1	Exercise	3	1	Group	Centre based	1	8															8	9	450	100	340	40	6MWT	8	9	43	15	35	16	LHFQ	8	9
Lynch 2014	2014	USA	0	100	100	0	0	0	54	67.2	35.6	0	Nutrition + behavioral skills training + social support	1	0	1 to 1 and Group	Home + clinic	1	12														-1.8 (-4.3 to 0.8) Kg in favour of the IG
Pibernik-Okanović 2015	2015	Croatia	0	0	100	100	0	0	66	54	30	1	Exercise + Education	1	1	Group	Tertiary diabetes clinic	2	52																													29	64
Pibernik-Okanović 2015	2015	Croatia	0	0	100	100	0	0	66	54	30	1	Exercise + Education	1	1	Group	Tertiary diabetes clinic	2	52																													29	57
Keihani 2015	2015	Iran	0	0	0	100	100	0	61	40	26	1	Exercise	3	0	1 to 1	Clinic	1	8															33	32	65.7	14.7	50.2	13.7	SF-36 PF								33	32
Dunbar 2015	2015	USA	0	0	100	0	100	0	57.4	34.3	37.1	0	Integrated HF-DM Self-Care Group	0.5	0	1 to 1	Home + clinic	1	24															29	37	330.9	79	275.8	95.9	6MWT	54	54	0.75	0.2	0.69	0.2	EQ-5D
Freedland 2015	2015	USA	0	72	38	100	100	18.4	55.8	46.2	33.6	0	CBT + Usual care	1	0	1 to 1	Home + clinic	1	24	79	79	90.6	59	98.8	58.5	Actigraph 7 day	79	79	34.77	8.03	32.41	8.11	BMI	79	79	309.9	130.19	312.9	131.4	6MWT	79	79	35.1	11.18	32	11.6	SF-12 pcs	79	79
Freedland 2015	2015	USA	0	72	38	100	100	18.4	55.8	46.2	33.6	0	CBT + Usual care	1	0	1 to 1	Home + clinic	2	52																						50	60	33.5	12.5	33.1	12.7	SF-12 pcs	79	79
Schneider 2016	2016	USA	0	0	100	100	0	0	53.4	100	34.6	1	Exercise	2	1	Group	University	1	12	15	14	17	9.7	17.8	14.9	Actigraph 7 day	14	14	34.6	6.1	34.5	5.5	BMI															14	14
Schneider 2016	2016	USA	0	0	100	100	0	0	53.4	100	34.6	1	Exercise	2	1	Group	University	2	24	15	14	15.3	10.5	13.8	11.9	Actigraph 7 day	14	11	34.3	6	33.4	5.2	BMI															14	11
Huang 2016	2016	Taiwan	0	0	100	100	0	0	56.4	52.5	26.2	0	Motivation enhancement therapy (MET) + CBT	1	1	Group	Clinic	1	12								31	30	25.64	4.34	25.45	5.73	BMI								31	30	75.71	21.59	75.06	18.06	SF-12 pcs	31	30
Huang 2016	2016	Taiwan	0	0	100	100	0	0	56.4	52.5	26.2	0	Motivation enhancement therapy (MET) + CBT	1	1	Group	Clinic	2	24								31	30	24.51	4.19	25.49	5.57	BMI								31	30	82.71	19.03	75.04	18.1	SF-12 pcs	31	30
de Groot 2019a	2019	USA	0	0	100	100	0	0	56	77		1	Exercise + Education	2	1	Group and self-help	Fitness centres	1	12								30	14	0.14	2.6	0.91	2.5	BMI	30	14	418.5	111.3	405.8	104.9	6MWT	30	14	44.06	11.2	38.3	9.98	SF-12 pcs	30	14
de Groot 2019b	2019	USA	0	0	100	100	0	0	56	77		1	Exercise + Education + CBT	2	1	Group and self-help	Fitness centres	1	12								25	14	0.04	2.4	0.91	2.5	BMI	25	14	394.4	125	405.8	104.9	6MWT	25	14	46.41	10.78	37.2	9.46	SF-12 pcs	25	14
[truncated: 132 more columns]
